# Supplementary material for: Anion-dependent assembly of Dy complexes: structures and magnetic behaviors
Source: Royal Society of Chemistry journal article supplement (doi:10.1039/c5ce00925a), 2015-01-01
Supplement: c5ce00925a1.pdf [file c5ce00925a1.pdf]

Supporting Information for

## **Anion-dependent assembly of Dy complexes: structures and magnetic behaviors**

Peng Chen,<sup>\*ab</sup> Meiqi Zhang,<sup>a</sup> Wenbin Sun,<sup>a</sup> Hongfeng Li,<sup>a</sup> Lang Zhao<sup>b</sup> and Pengfei Yan<sup>\*a</sup>

<sup>a</sup> Key Laboratory of Functional Inorganic Material Chemistry (MOE), School of Chemistry and Materials Science, Heilongjiang University, Harbin 150080, PR China. E-mail address: jehugu@gmail.com (Chen P.); yanpf@vip.sina.com (Yan P.)

<sup>b</sup> State Key Laboratory of Rare Earth Resource Utilization, Changchun Institute of Applied Chemistry, Chinese Academy of Sciences, Changchun 130022, China.

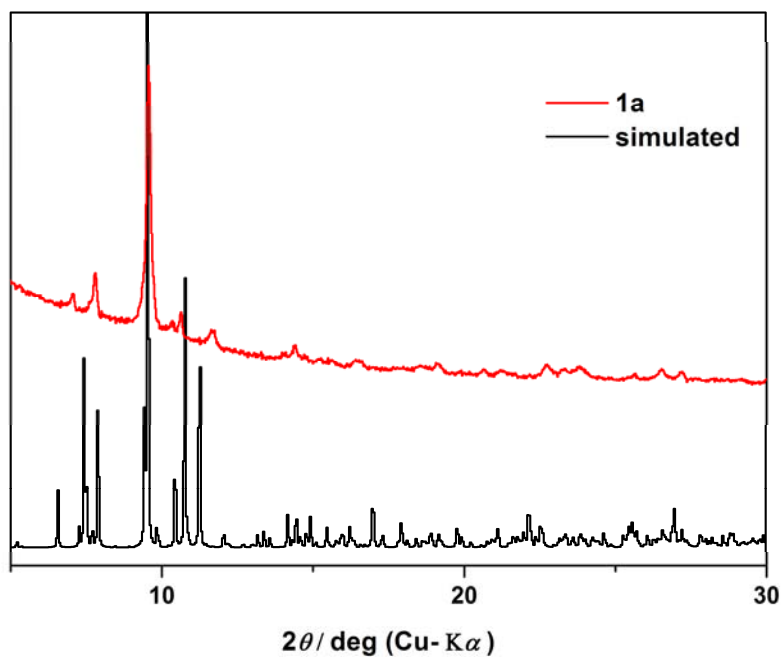

**Figure S1** Simulated and experimental Xrd patterns of **1a**.

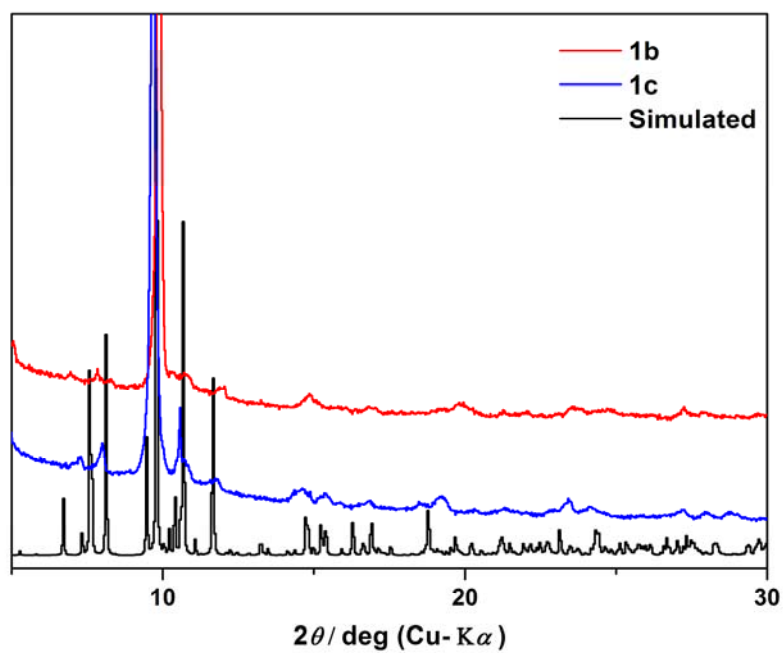

**Figure S2** Simulated and experimental Xrd patterns of **1b** and **1c**.

**1a–1c** are supposed to be sensitive to the air that the single crystal analyses were performed at 150 K under N<sub>2</sub> atmosphere. And their structures collapse on desolvation, when powder X-ray analyses are performed.

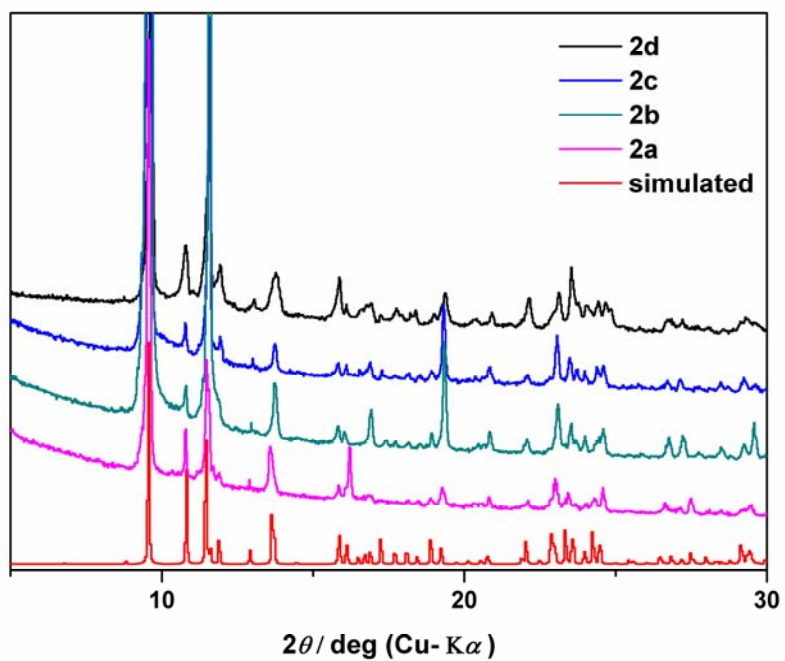

**Figure S3** Simulated and experimental Xrd patterns of **2a–2d**.

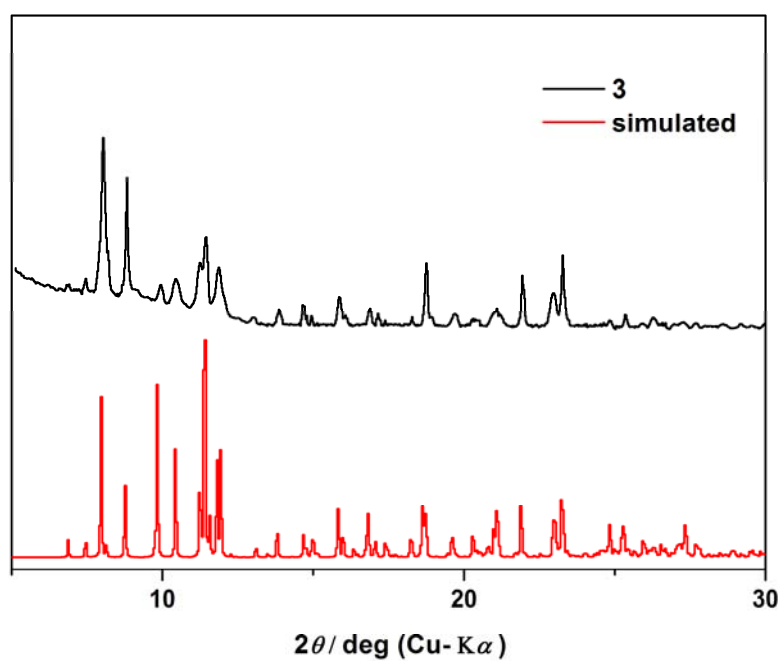

**Figure S4** Simulated and experimental Xrd patterns of **3**.

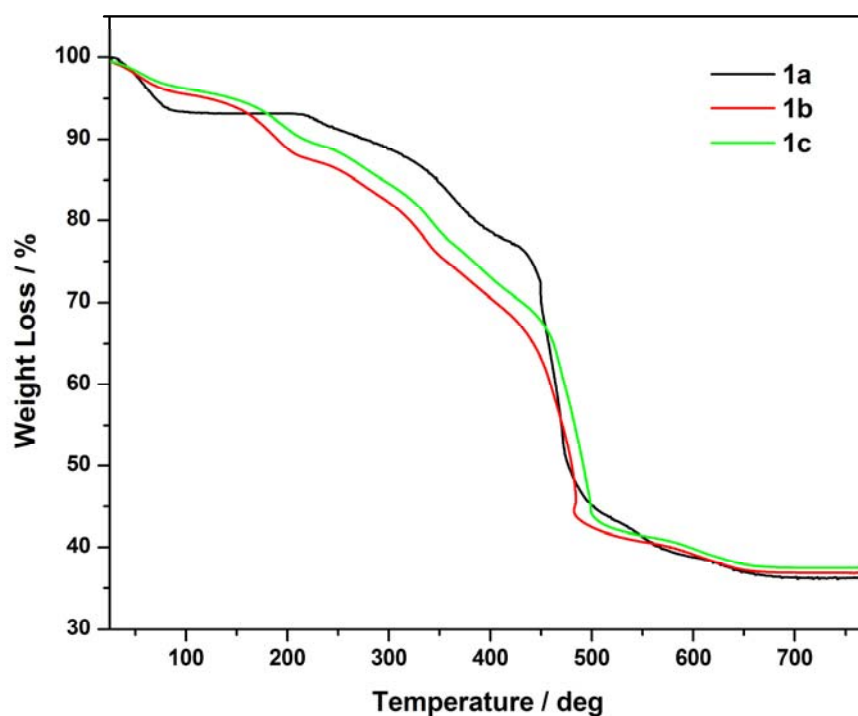

**Figure S5** TG curves of **1a**, **1b** and **1c**.

TG analysis indicates a total weight loss of 63.88 wt% (calcd. 65.94 wt%) for **1a**. The first stage is ascribed to the loss of methanol and hydrate molecules until 100 °C (found 6.82 wt%, calcd. 7.08 wt%). And the second stage occurring at 220 °C until 430 °C is owing to the removal of one ligand (found 17.3 wt%, calcd. 17.90 wt%). However, it is hard to distinguish each other that the loss of the second ligand of and decomposition of the acetates might be a continuous process. Around 470 °C, the acetates start to decompose. For the case of **1b** and **1c**, it is evident that their stability is much poorer than **1a**, and the ligand starts to decompose around 100 °C. However, similar temperature range has been observed for the removal of second ligand and acetates as **1a**. In all, a total weight loss of 61.88 wt% and 61.42 wt% (calcd. 63.04 wt% and 62.59 wt%) are found for **1b** and **1c**, respectively.

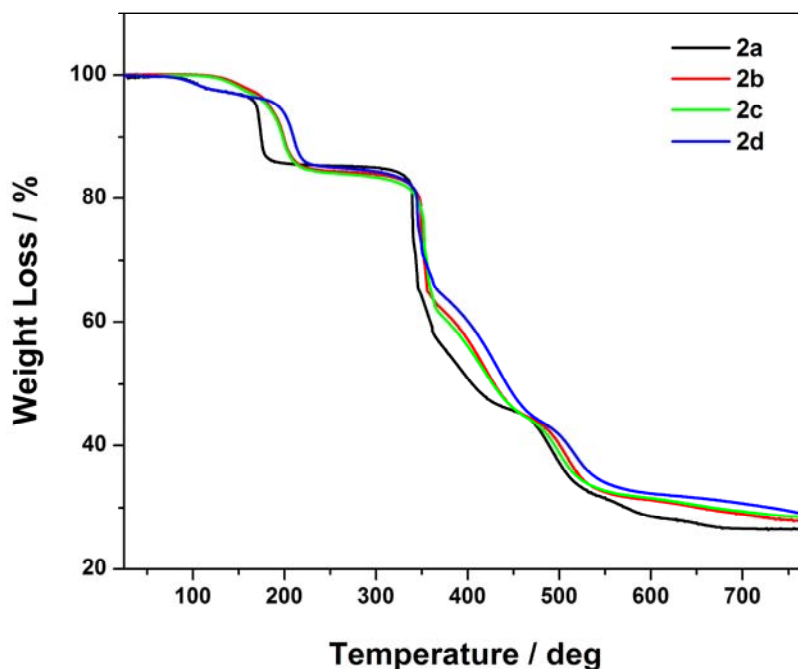

**Figure S6** TG curves of **2a–2d**.

TG analyses indicate a total weight loss of 73.48, 72.16, 71.50 and 71.05 wt% (calcd. 73.86, 72.22, 71.83 and 71.32 wt%) for **2a–2d** in the experimental range, respectively. The first stage is mainly ascribed to the loss of methanol molecules around 190 °C, and the second stage is owing to the removal of DMSO molecules until 300 °C. For the first two stages, a total weight loss of 15.01, 16.92, 16.61 and 15.67 wt% is found (calcd. 17.12, 16.73, 16.64 and 16.52 wt %), respectively. Then, further weight loss (~40 wt%) is detected until ~480 °C, which is corresponding to the decomposition of the ligand (calcd. 41.21, 40.29, 40.08 and 39.79 wt%). Finally, the rest weight loss is believed to the removal of nitrate groups until the end of the experiments.

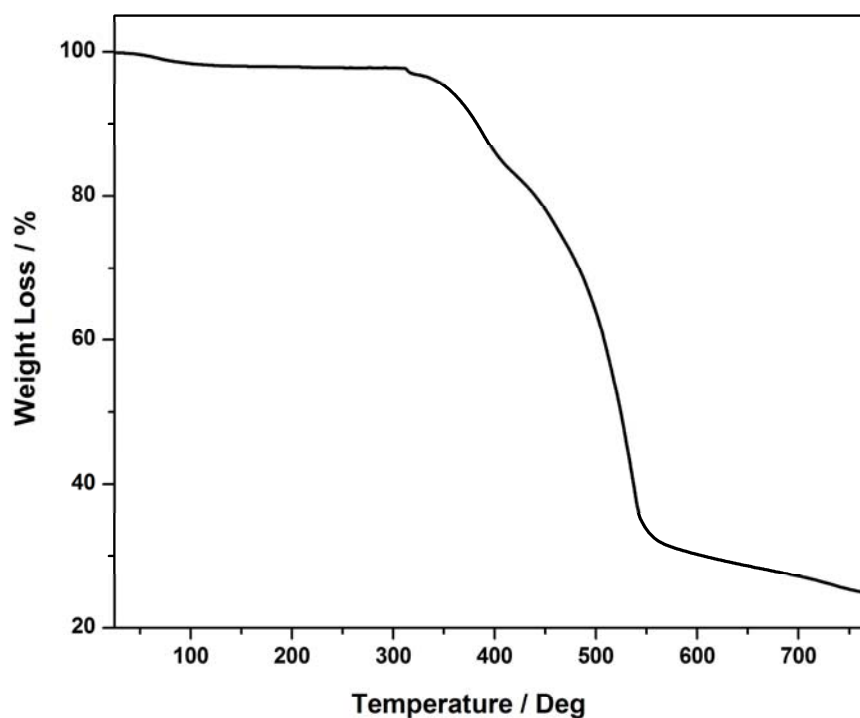

**Figure S7** TG curve of **3**.

TG analysis indicates a total weight loss of 65.30 wt% (calcd. 66.94 wt%) for **3**. In the first stage, the loss of methanol is found until 100 °C (1.87 wt%, calcd. 1.98 wt%). Then, the main weight loss is attributed to the removal of the ligand (calcd. 65.62 wt%), and the third stage is owing to the decomposition of perchloride (calcd. 10.34 wt%). The removal of the ligand and perchloride might be a continuous process that it is not possible to clearly distinguish them. Unfortunately, we can not measure it at higher experimental temperature due to the limitation of the equipment.

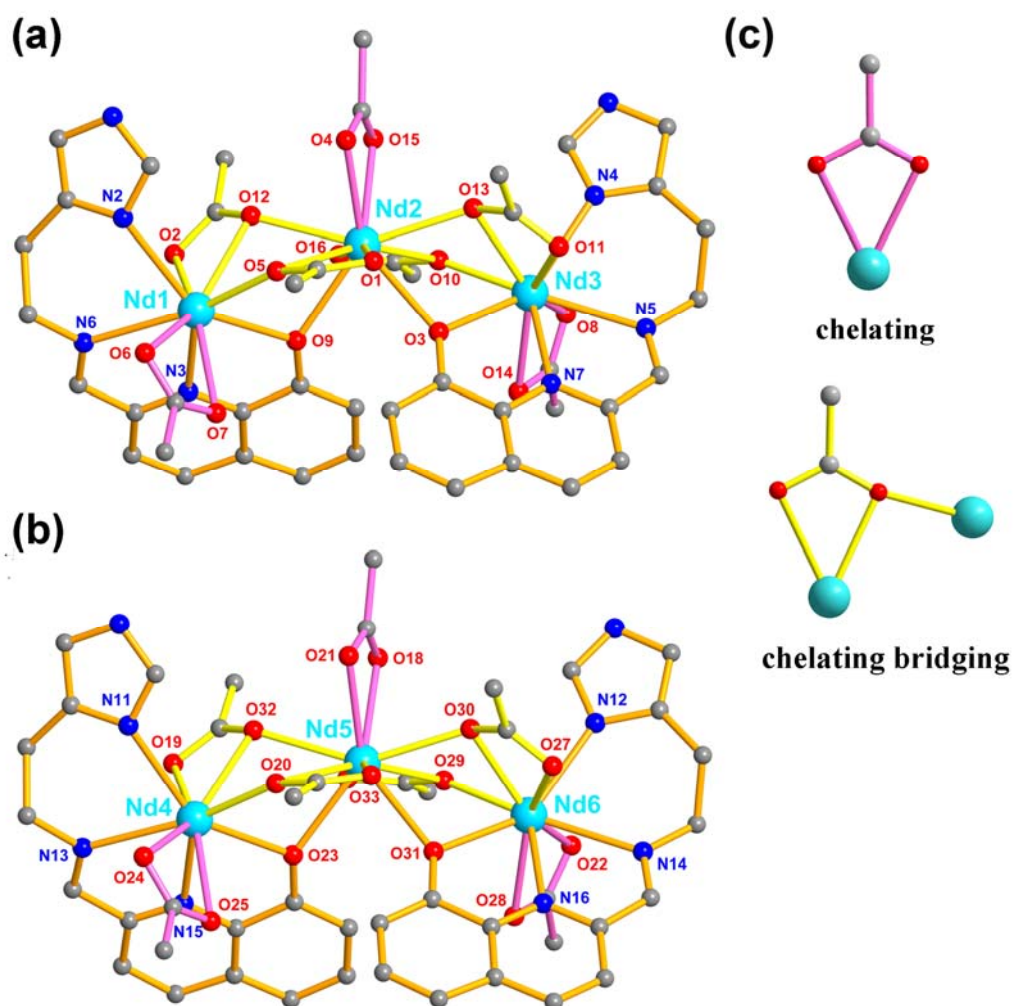

**Figure S8** Partially labeled units containing Nd1 (a) and Nd4 (b) ions in **1a** (Hydrogen atoms have been omitted for clarity); (c) coordination modes found for acetates in **1a**.

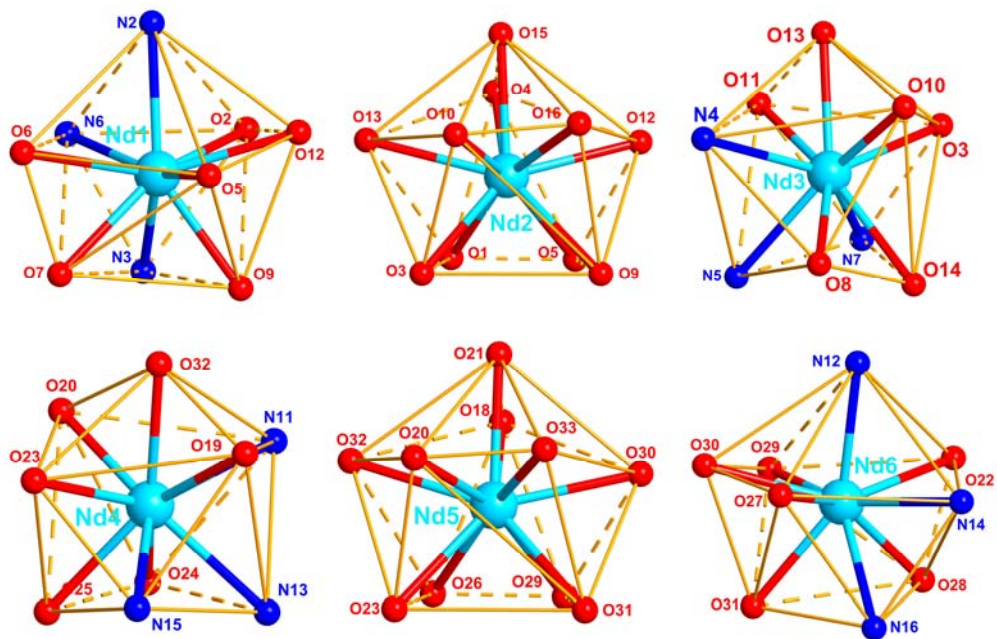

**Figure S9** Coordination geometry of  $\text{Dy}^{3+}$  ions in **1a**

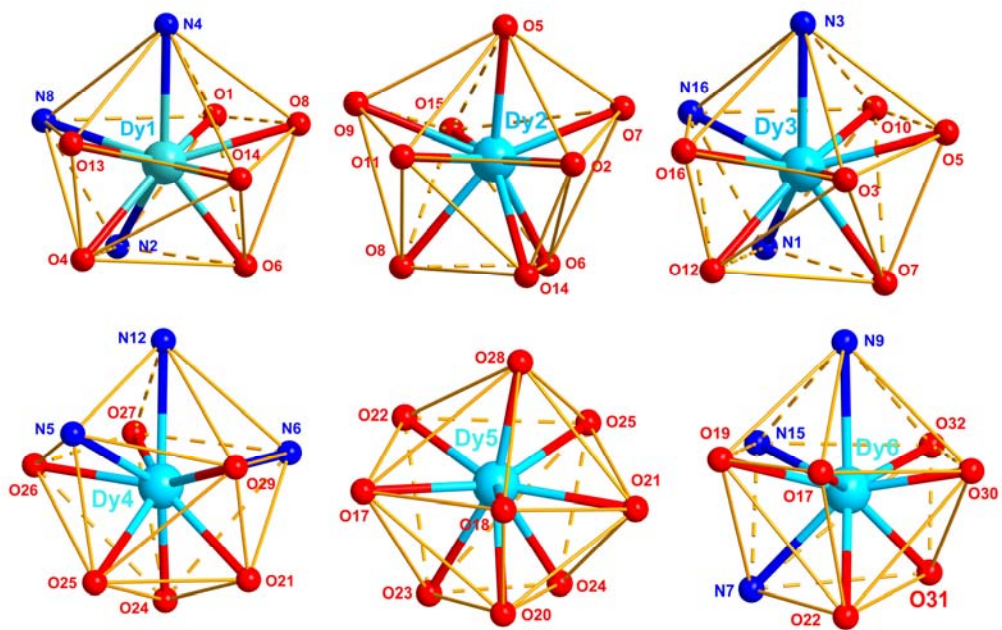

**Figure S10** Coordination geometry of  $\text{Dy}^{3+}$  ions in **1c**



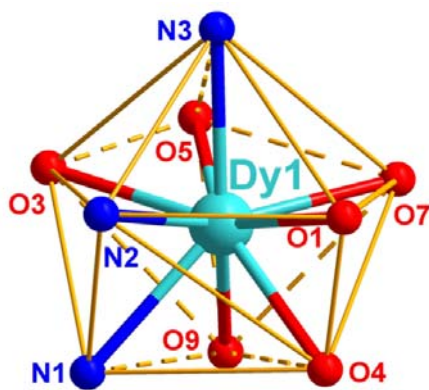

**Figure S11** Coordination geometry of  $\text{Dy}^{3+}$  ions in **2c**

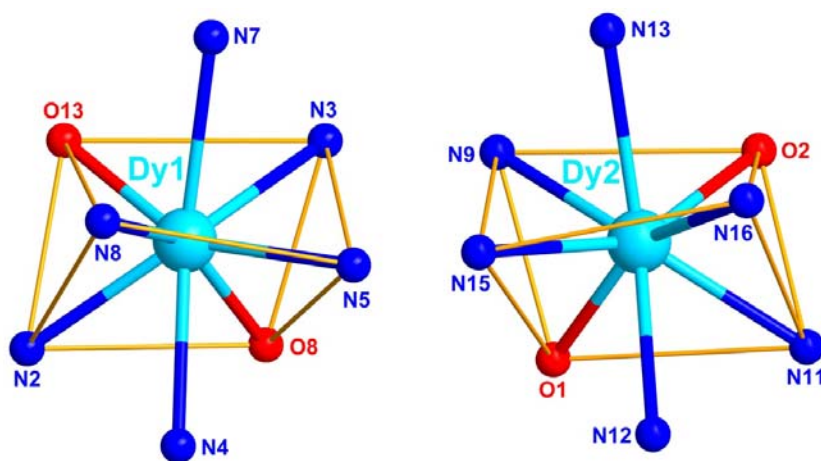

**Figure S12** Coordination geometry of  $\text{Dy}^{3+}$  ions in **3**

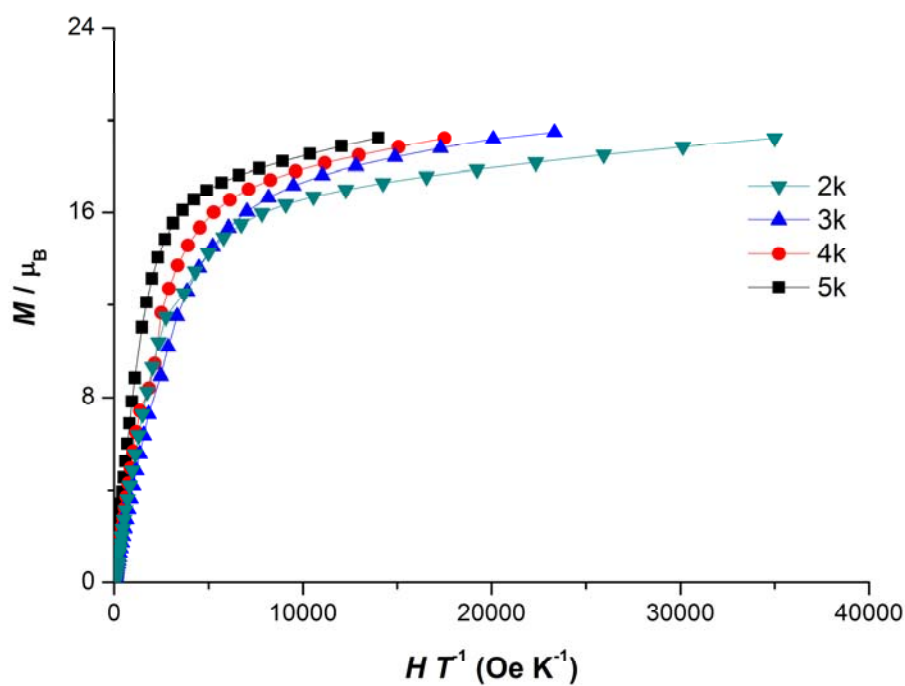

**Figure S13**  $M$  vs.  $H/T$  plot at the indicated temperature for **1c**.

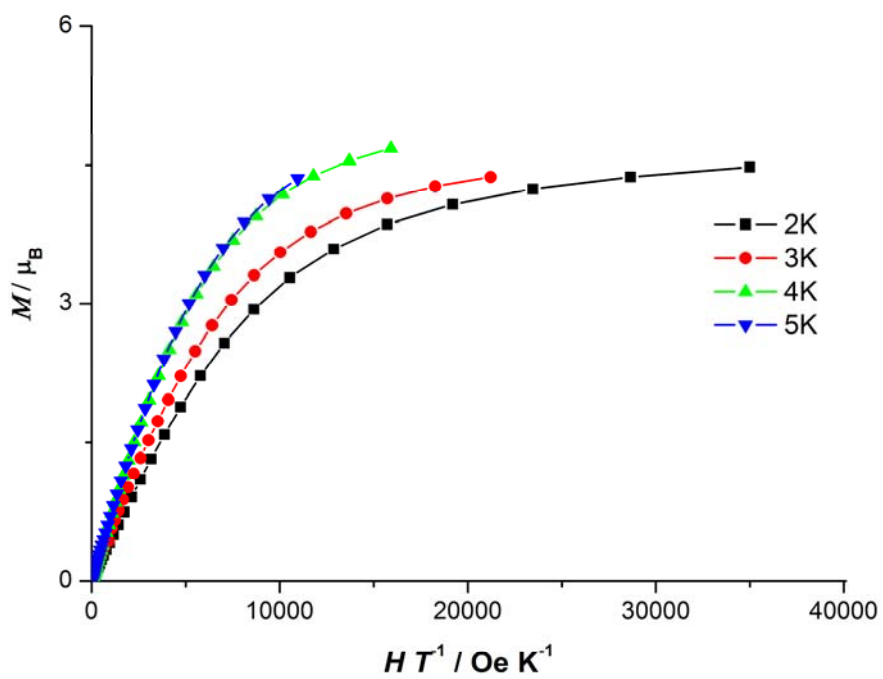

**Figure S14**  $M$  vs.  $H/T$  plot at the indicated temperature for **2c**.

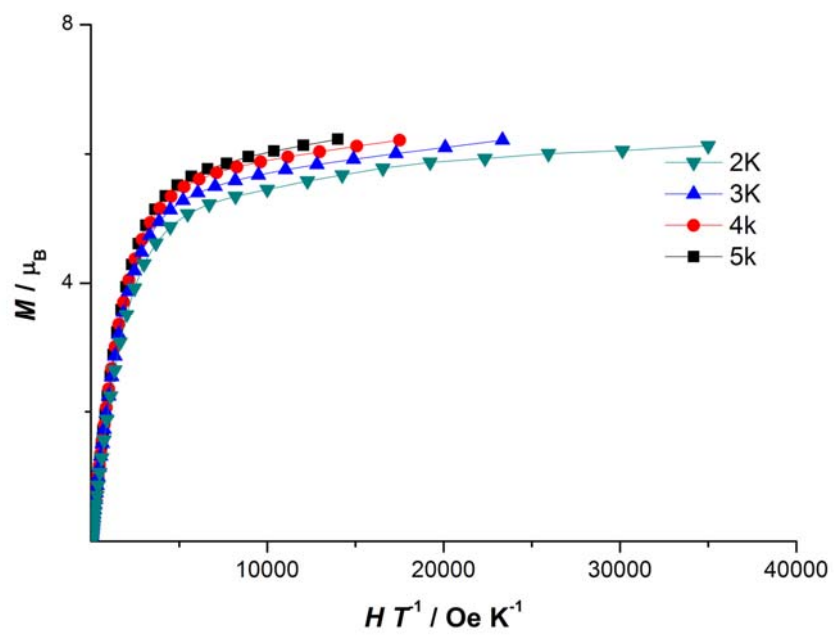

**Figure S15**  $M$  vs.  $H/T$  plot at the indicated temperature for **3**.

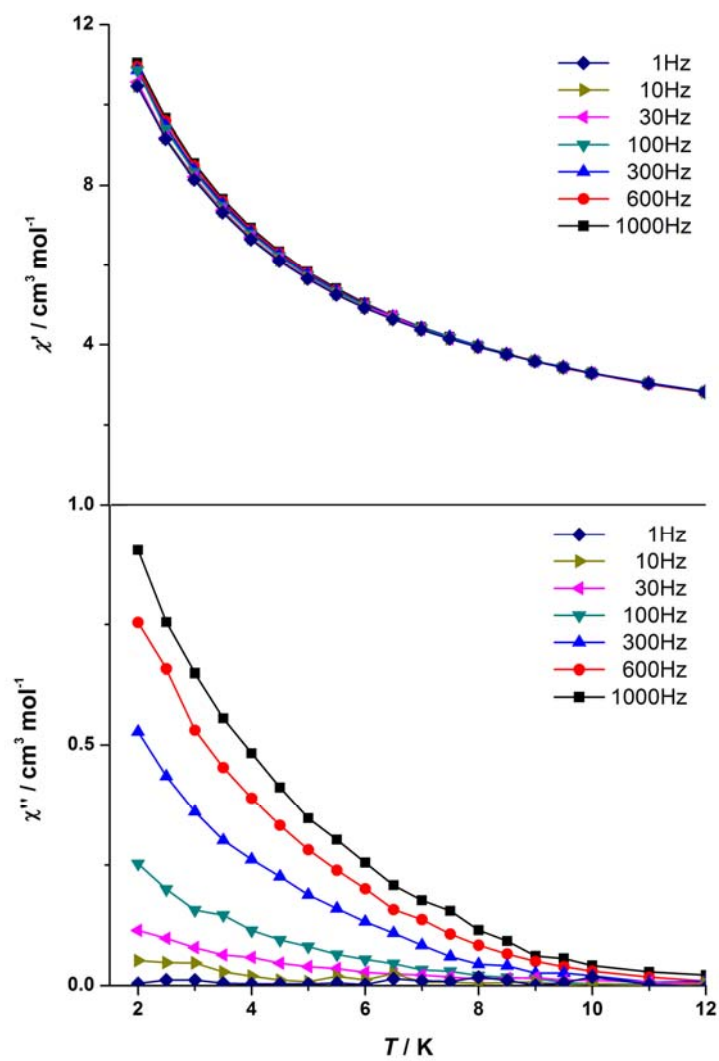

**Figure S16** Temperature dependence of in-phase and out-of-phase ac susceptibility of **1c** under zero dc field.

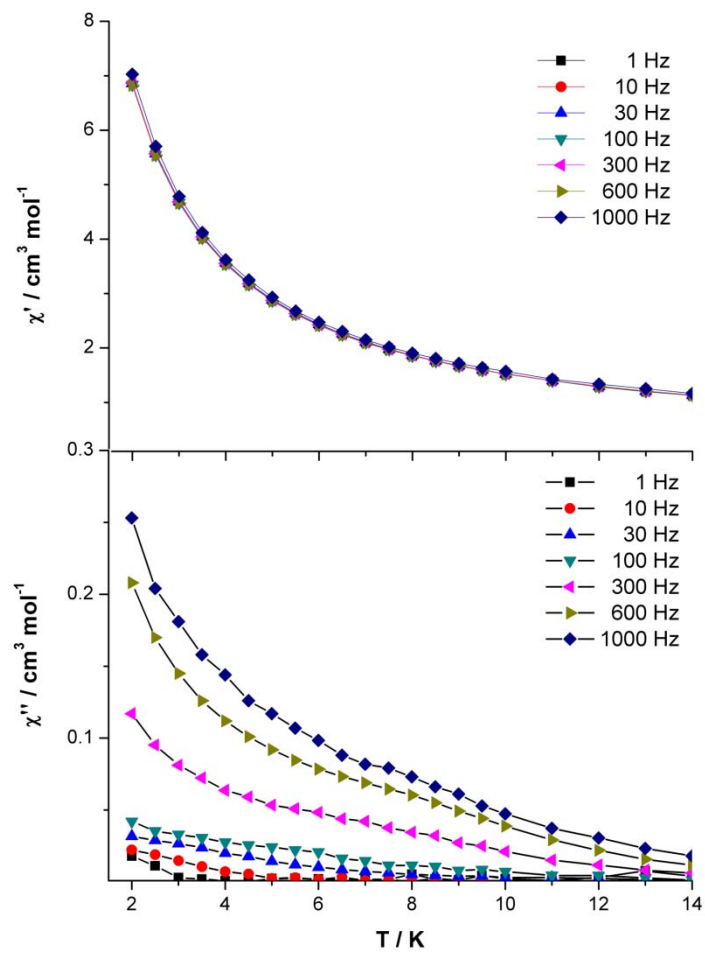

**Figure S17** Temperature dependence of in-phase and out-of-phase ac susceptibility of **2c** under zero dc field.

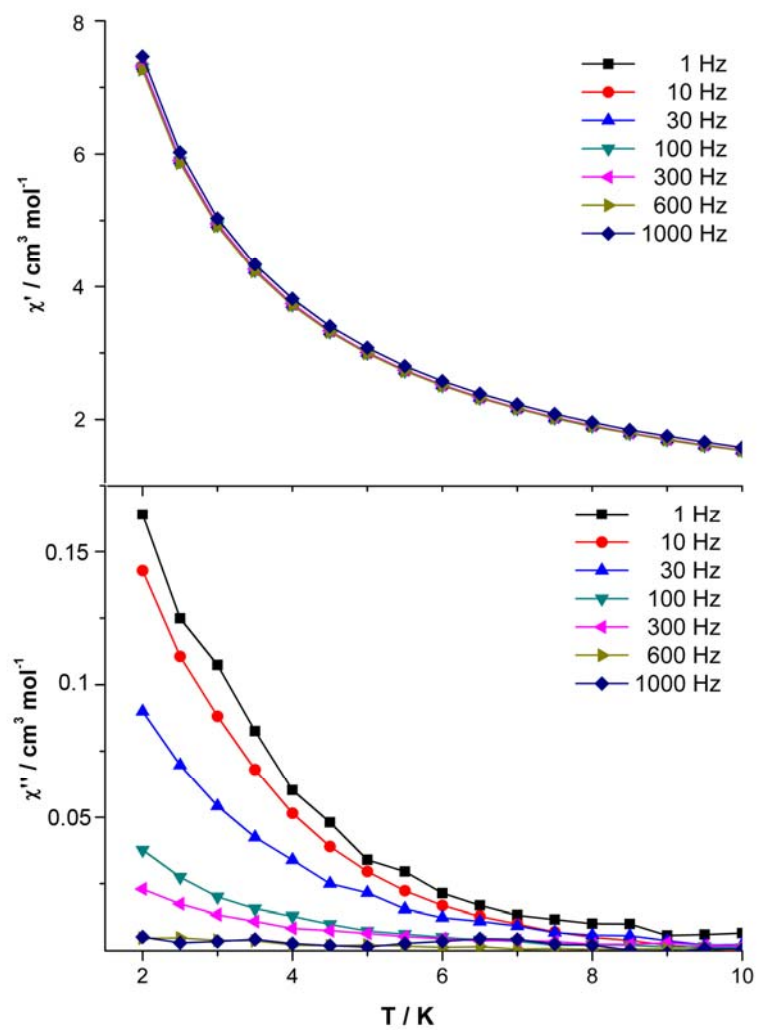

**Figure S18** Temperature dependence of in-phase and out-of-phase ac susceptibility of **3** under zero dc field.

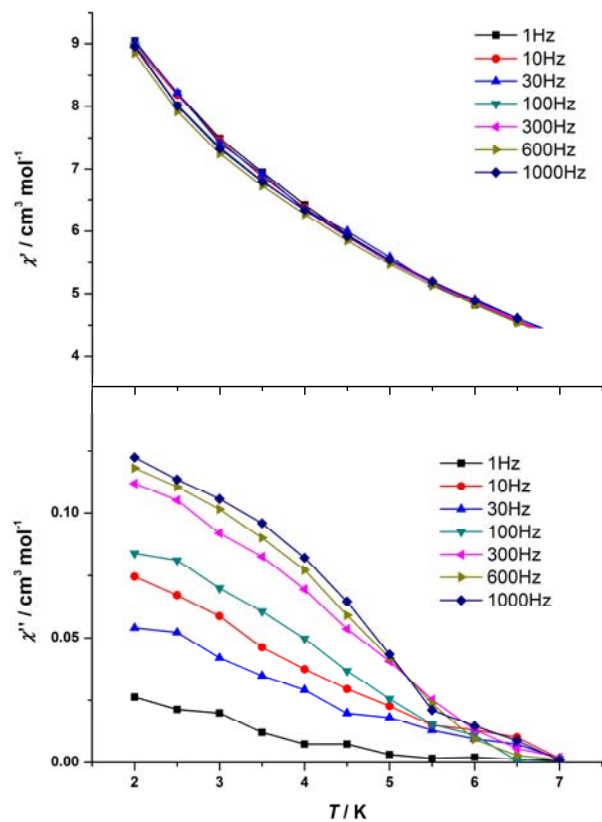

**Figure S19** Temperature dependence of in-phase and out-of-phase ac susceptibility of **1c** under applied dc field of 2000 Oe.

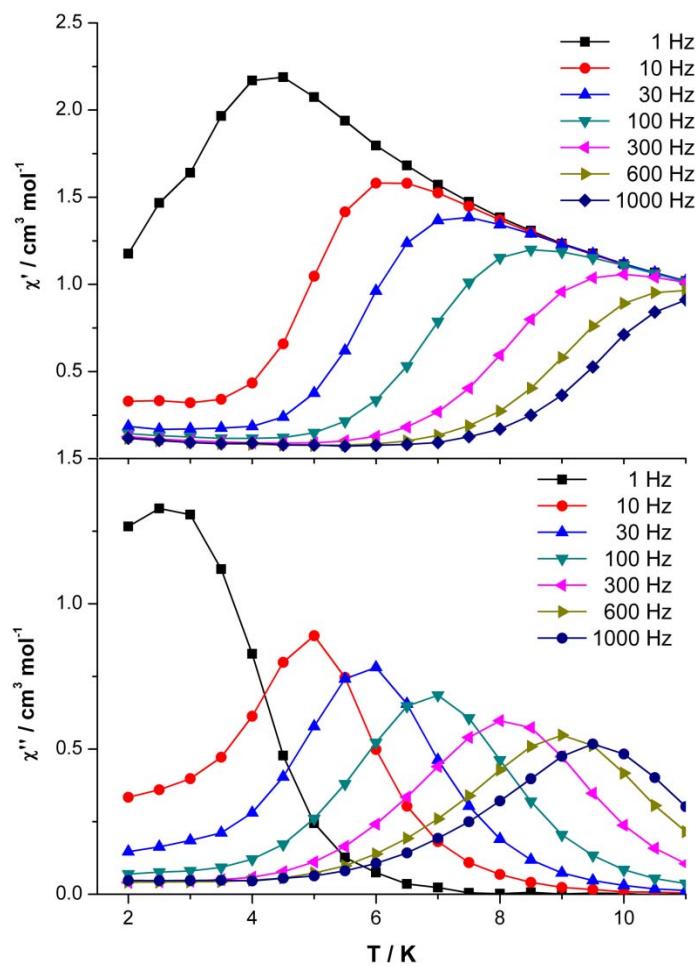

**Figure S20** Temperature dependence of in-phase and out-of-phase ac susceptibility of **2c** under applied dc field of 2000 Oe.



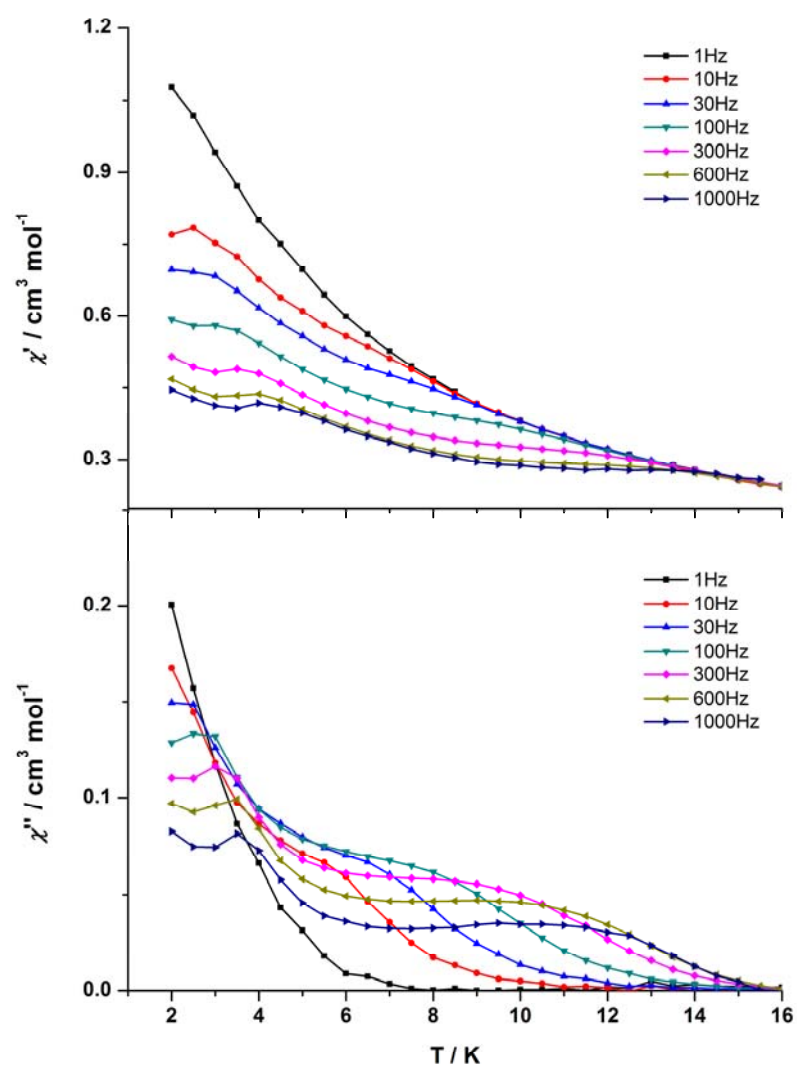

**Figure S21** Temperature dependence of in-phase and out-of-phase ac susceptibility of **3** under applied dc field of 2000 Oe.

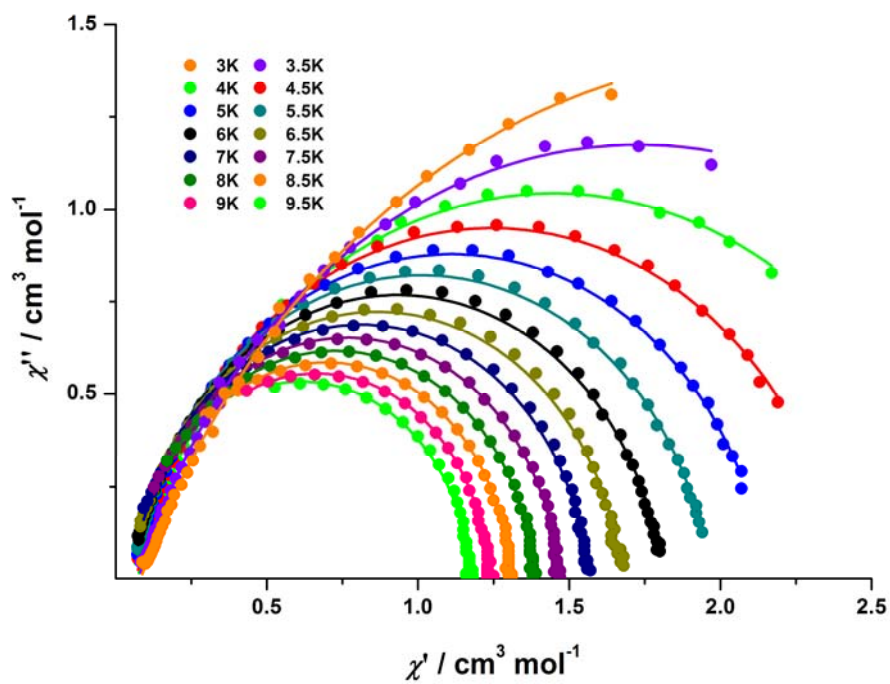

Figure S22 Cole–Cole plot of 2c at the indicated temperature

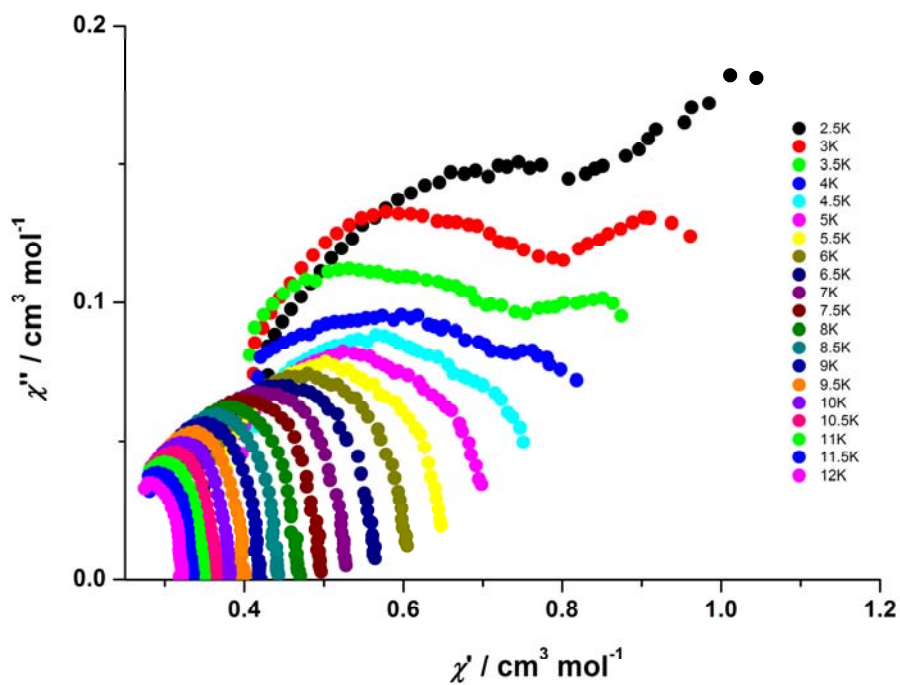

Figure S23 Cole–Cole plot of 3 at the indicated temperature

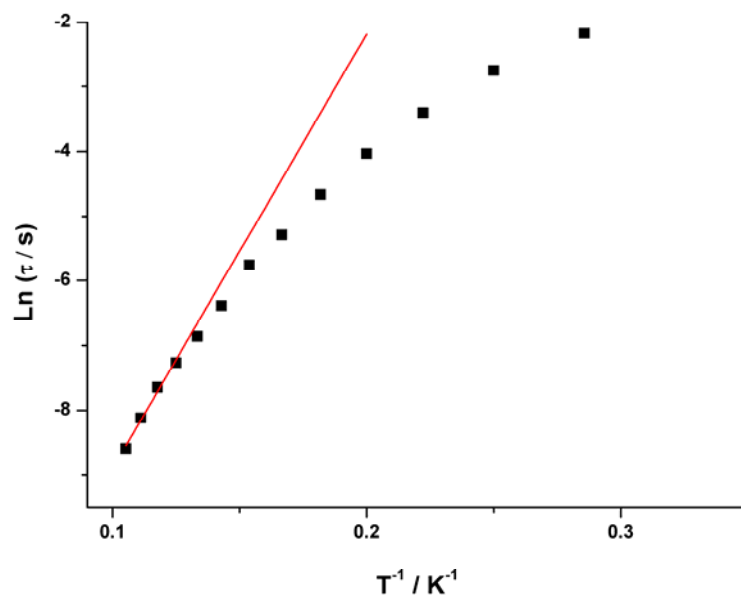

**Figure S24** Magnetization relaxation time,  $\tau$ , versus  $T^{-1}$  plot for **2c** under an applied dc field of 2000 Oe

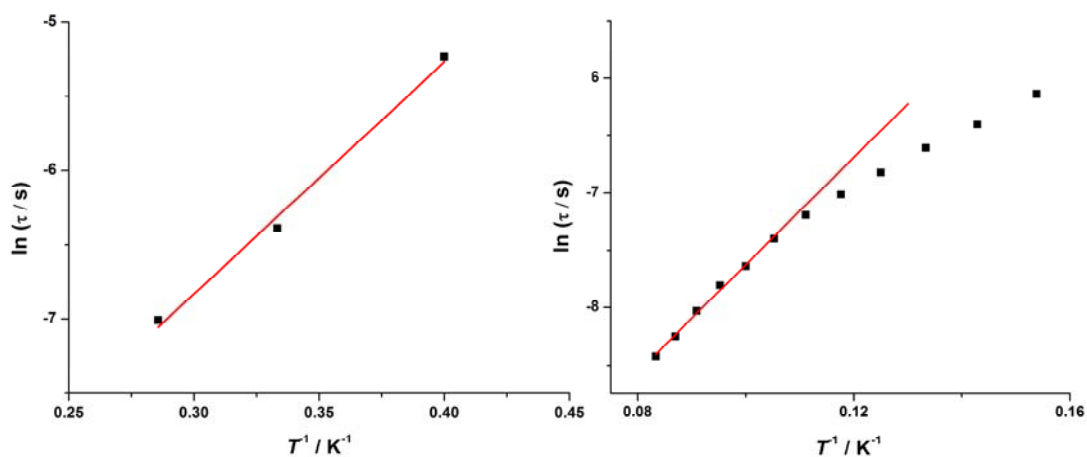

**Figure S25** Magnetization relaxation time,  $\tau$ , versus  $T^{-1}$  plot (left, low temperature domain; right, high temperature domain) for **3** under an applied dc field of 2000 Oe
